# Supplementary material for: Metabolic reprogramming of human CD8+ memory T cells through loss of SIRT1
Source: PubMed Central journal article supplement — J Exp Med. 2018 Jan 2;215(1):51–62. doi: 10.1084/jem.20161066 (PMC5748845; doi:10.1084/jem.20161066), 2018-01-02
Supplement: JEM_20161066_sm.pdf [file JEM_20161066_sm.pdf]

## SUPPLEMENTAL MATERIAL

Jeng et al., <https://doi.org/10.1084/jem.20161066>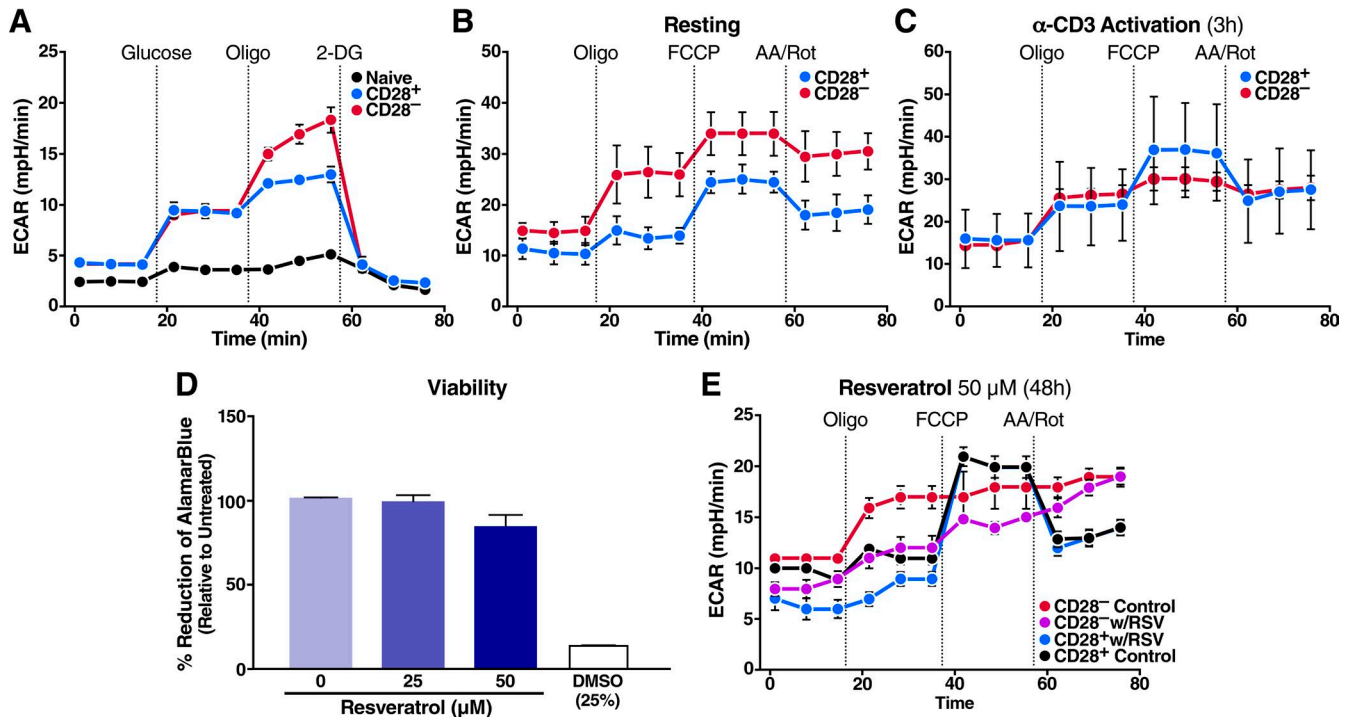

Figure S1. **Glycolytic capacity of resting CD8<sup>+</sup>CD28<sup>-</sup> T cells depends on glucose and SIRT1.** Metabolism of sorted human T cell populations was assessed using an extracellular flux analyzer. (A) ECAR was measured in freshly isolated and glucose-deprived T cell populations after sequential addition of glucose, oligomycin, and 2-DG (representative,  $n = 2$  biological replicates,  $n = 6$  technical replicates). (B and C) ECAR measurement of resting (B) and activated (C) T cells (3 h with anti-CD3 antibody; mean of  $n = 2$  biological replicates,  $n = 6$  technical replicates). (D) Viability of human CD8<sup>+</sup> T cells assessed by alamarBlue assay after RSV treatment for 48 h; 25% DMSO was used as toxicity control ( $n = 2$  biological in technical triplicates). (E) ECAR analysis of CD28<sup>+</sup> and CD28<sup>-</sup> subsets in the presence of 50  $\mu$ M RSV (representative,  $n = 2$  biological replicates,  $n = 6$  technical replicates). Data are mean  $\pm$  SEM of technical replicates and individual donors.

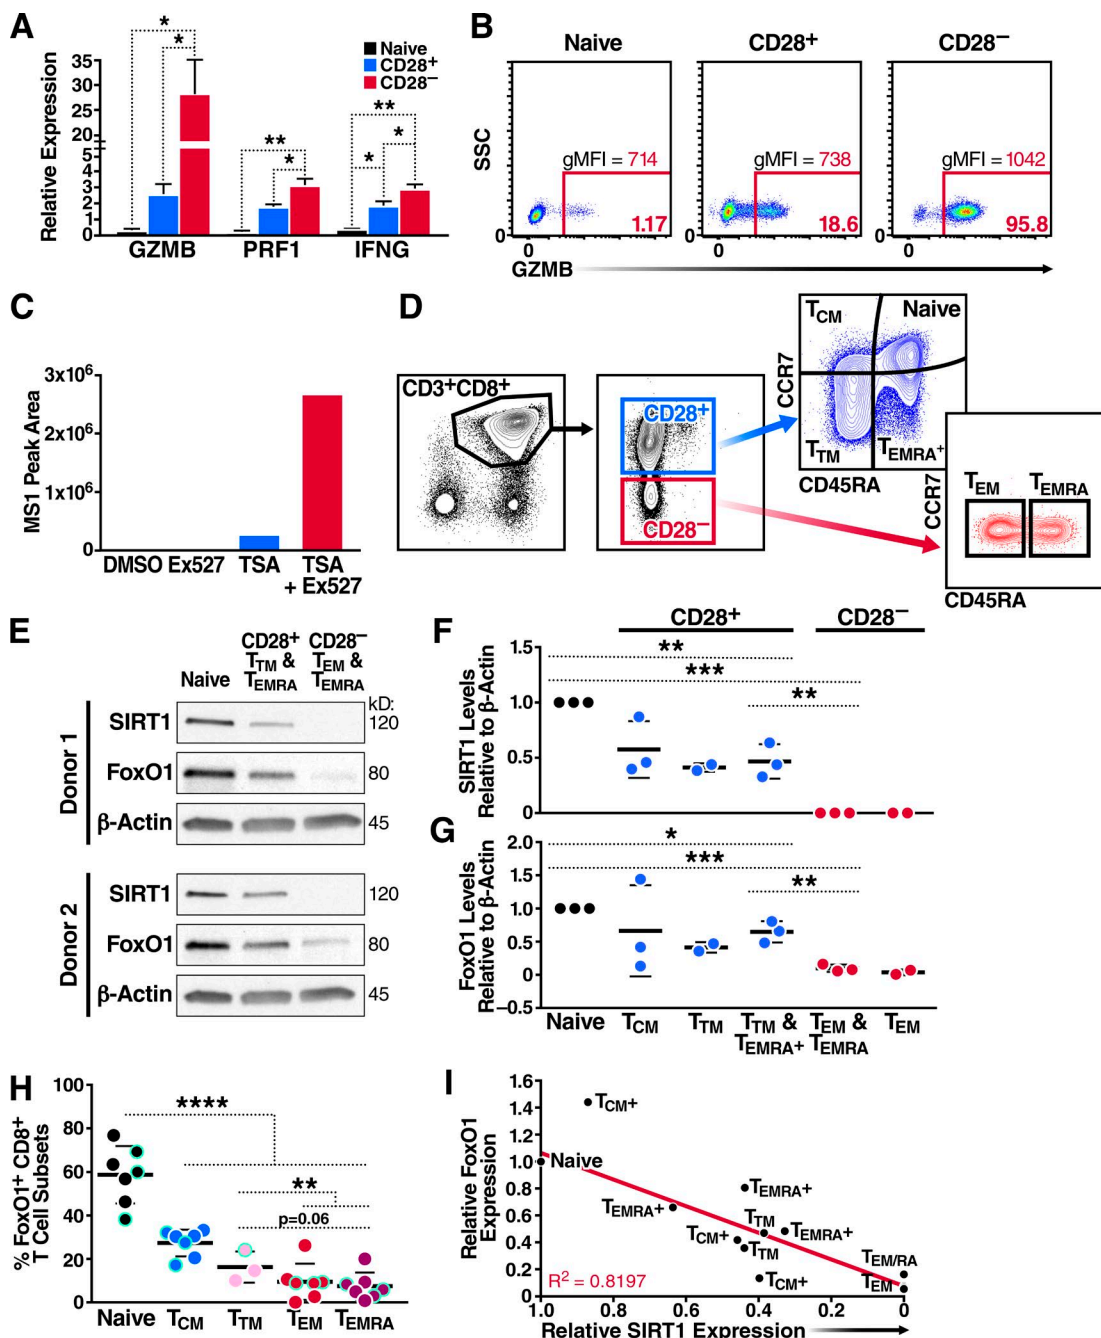

Figure S2. **Cytotoxicity and FoxO1 status in CD8<sup>+</sup> T cell subsets.** (A) Cytotoxic gene expression assessed by qRT-PCR in freshly isolated human T cells relative to the mean expression in CD28<sup>+</sup> cells ( $n = 7$ , two-way ANOVA). (B) GZMB intracellular staining was measured by flow cytometry in resting T cell populations treated with brefeldin A for 4 h (representative,  $n = 3$ , numbers show geometric median fluorescence intensity). (C) Freshly isolated CD8<sup>+</sup> T cells were analyzed by mass spectrometry for AcK peptides (treated with 400 nM TSA and 25  $\mu$ M Ex-527 for 4 h). The integrated MS1 intensity for peptide AASMDNNSK(ac)FAK is shown ( $n = 1$ ). (D) Representative sorting flow plot of CD8<sup>+</sup>CD28<sup>+</sup> and CD28<sup>-</sup> T cells stained for memory markers CCR7 and CD45RA. (E-G) Naive, CD28<sup>+</sup> T<sub>CM</sub>, T<sub>TM</sub> + T<sub>EMRA</sub><sup>+</sup>, and CD28<sup>-</sup> T<sub>EM</sub> + T<sub>EMRA</sub> were sorted as shown in D, probed for SIRT1 and FoxO1 expression by Western blot, and quantified by densitometry (F and G;  $n = 3$  biological replicates). (H) CD8<sup>+</sup> memory T cell subsets from CMV<sup>-</sup> and CMV<sup>+</sup> (green circles) blood donors were stained for intracellular FoxO1 protein and analyzed by flow cytometry ( $n = 7$  biological replicates and  $n = 3$  for T<sub>TM</sub>, paired one-way ANOVA). (I) Linear regression analysis of SIRT1 and FoxO1 Western blots in sorted subsets ( $R^2 = 0.819$ ). Data are mean  $\pm$  SEM of individual donors. \*,  $P < 0.05$ ; \*\*,  $P < 0.01$ ; \*\*\*,  $P < 0.001$ ; \*\*\*\*,  $P < 0.0001$ .

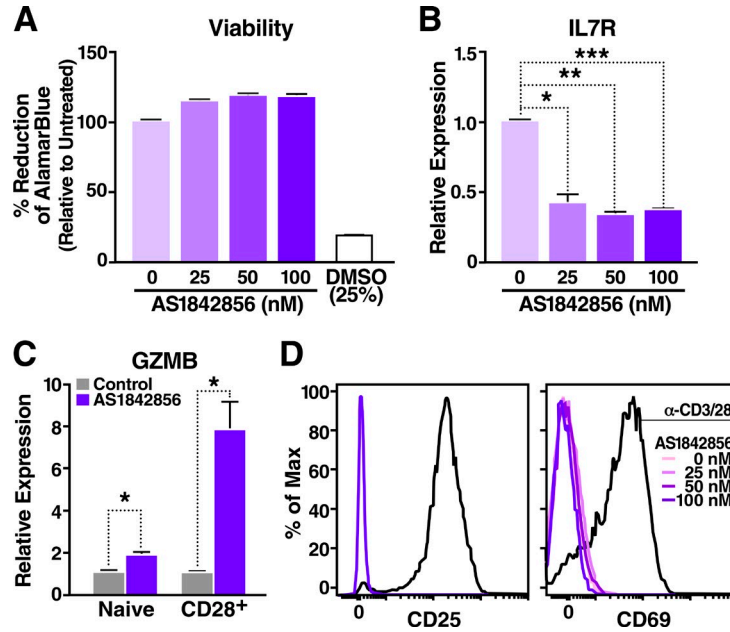

Figure S3. **FoxO1 inhibitor increases GZMB expression without T cell activation.** (A) Viability of human CD8<sup>+</sup> T cells was assessed with an alamarBlue assay after AS1842856 treatment for 48 h; DMSO (25%) served as toxicity control ( $n = 2$  biological replicates in technical duplicates). (B) IL7R mRNA was measured by qRT-PCR, normalized to RPL13A mRNA and to untreated control, in human CD8<sup>+</sup> T cells after increasing doses of AS1842856 for 48 h ( $n = 3$ , paired two-tailed Student's  $t$  test). (C) GZMB mRNA was measured in sorted CD8<sup>+</sup> naive and CD8<sup>+</sup>CD28<sup>+</sup> memory T cells after treatment with 100 nM AS1842856 for 48 h ( $n = 3$ , paired two-tailed Student's  $t$  test). (D) Activation markers CD25 and CD69 were assessed by flow cytometry in CD8<sup>+</sup> T cells after 48-h treatment of AS1842856 or  $\alpha$ -CD3/28 activation (representative,  $n = 2$ ). Data are mean  $\pm$  SEM of individual donors. \*,  $P < 0.05$ ; \*\*,  $P < 0.01$ ; \*\*\*,  $P < 0.001$ .

Table S1. Microarray identifies 159 differentially regulated genes between CD8<sup>+</sup>CD28<sup>+</sup> and CD8<sup>+</sup>CD28<sup>-</sup> T cells

| Gene name                                 | entrez_ids | log <sub>2</sub> fold change | P-value | FDR     |
|-------------------------------------------|------------|------------------------------|---------|---------|
| <b>Up-regulated in CD28<sup>-</sup></b>   |            |                              |         |         |
| <i>GPR141</i>                             | 353345     | 3.04618                      | 0.00000 | 0.00000 |
| <i>FCGR3A</i>                             | 2214       | 2.91839                      | 0.00002 | 0.00012 |
| <i>CX3CR1</i>                             | 1524       | 2.91351                      | 0.00000 | 0.00001 |
| <i>KLRF1</i>                              | 51348      | 2.70094                      | 0.00002 | 0.00008 |
| <i>TXNDC3</i>                             | 51314      | 2.38590                      | 0.00000 | 0.00000 |
| <i>GNLY</i>                               | 10578      | 2.31302                      | 0.00000 | 0.00005 |
| <i>PLEK</i>                               | 5341       | 2.04459                      | 0.00032 | 0.00190 |
| <i>PDGFD</i>                              | 80310      | 2.02545                      | 0.00011 | 0.00068 |
| <i>ZEB2</i>                               | 9839       | 2.01872                      | 0.00000 | 0.00001 |
| <i>FCRL6</i>                              | 343413     | 1.81571                      | 0.00329 | 0.00986 |
| <i>GZMB</i>                               | 3002       | 1.78378                      | 0.00357 | 0.01430 |
| <i>KLRD1</i>                              | 3824       | 1.68624                      | 0.00094 | 0.00564 |
| <i>GZMH</i>                               | 2999       | 1.65432                      | 0.00000 | 0.00003 |
| <i>KIR2DS2</i>                            | 100132285  | 1.59739                      | 0.00076 | 0.00306 |
| <i>KIR2DL1</i>                            | 3802       | 1.56286                      | 0.00031 | 0.00186 |
| <i>PRSS23</i>                             | 11098      | 1.51952                      | 0.00001 | 0.00004 |
| <i>TGFBR3</i>                             | 7049       | 1.49051                      | 0.00002 | 0.00013 |
| <i>NKG7</i>                               | 4818       | 1.47231                      | 0.00083 | 0.00500 |
| <i>TNFRSF9</i>                            | 3604       | 1.47152                      | 0.01948 | 0.04680 |
| <i>EPB41L4A</i>                           | 64097      | 1.45895                      | 0.00288 | 0.01730 |
| <i>KLRA1</i>                              | 10748      | 1.34042                      | 0.00529 | 0.01590 |
| <i>FGFBP2</i>                             | 83888      | 1.33460                      | 0.00013 | 0.00077 |
| <i>LYN</i>                                | 4067       | 1.33105                      | 0.00000 | 0.00000 |
| <i>GPR56</i>                              | 9289       | 1.32119                      | 0.00116 | 0.00464 |
| <i>PTPN12</i>                             | 5782       | 1.30337                      | 0.00006 | 0.00034 |
| <i>FAM49A</i>                             | 81553      | 1.29781                      | 0.00108 | 0.00648 |
| <i>SUSD1</i>                              | 64420      | 1.29745                      | 0.00028 | 0.00170 |
| <i>ST8SIA6</i>                            | 338596     | 1.29096                      | 0.00579 | 0.02090 |
| <i>GALNT3</i>                             | 2591       | 1.27587                      | 0.00325 | 0.01950 |
| <i>RHOBTB3</i>                            | 22836      | 1.27035                      | 0.00042 | 0.00316 |
| <i>PIK3R3</i>                             | 8503       | 1.26994                      | 0.00358 | 0.01430 |
| <i>CD244</i>                              | 51744      | 1.26005                      | 0.00034 | 0.00207 |
| <i>TOX</i>                                | 9760       | 1.23303                      | 0.00000 | 0.00002 |
| <i>BHLHE40</i>                            | 8553       | 1.22762                      | 0.01181 | 0.03540 |
| <i>PRF1</i>                               | 5551       | 1.22406                      | 0.00001 | 0.00007 |
| <i>RAP2A</i>                              | 5911       | 1.21786                      | 0.00184 | 0.01100 |
| <i>UBE2F</i>                              | 140739     | 1.20307                      | 0.00046 | 0.00279 |
| <i>SLCO4C1</i>                            | 353189     | 1.16089                      | 0.00062 | 0.00248 |
| <i>DUSP10</i>                             | 11221      | 1.15745                      | 0.00120 | 0.00360 |
| <i>CMKLR1</i>                             | 1240       | 1.14464                      | 0.00023 | 0.00091 |
| <i>LYST</i>                               | 1130       | 1.13964                      | 0.00068 | 0.00407 |
| <i>PIK3AP1</i>                            | 118788     | 1.13478                      | 0.00087 | 0.00524 |
| <i>PRDM1</i>                              | 639        | 1.13389                      | 0.01228 | 0.04760 |
| <i>RCAN2</i>                              | 10231      | 1.12531                      | 0.01148 | 0.03450 |
| <i>PDLIM1</i>                             | 9124       | 1.11957                      | 0.00217 | 0.01620 |
| <i>EGR2</i>                               | 1959       | 1.09724                      | 0.00768 | 0.01840 |
| <i>F2R</i>                                | 2149       | 1.09415                      | 0.00027 | 0.00163 |
| <i>OR7E13P</i>                            | 10820      | 1.08994                      | 0.00730 | 0.02920 |
| <i>DDI1</i>                               | 414301     | 1.07559                      | 0.00056 | 0.00477 |
| <i>USP28</i>                              | 57646      | 1.06786                      | 0.00007 | 0.00040 |
| <i>KLRG1</i>                              | 10219      | 1.04885                      | 0.01903 | 0.04570 |
| <i>PTMS</i>                               | 5763       | 1.04800                      | 0.00001 | 0.00004 |
| <i>PTGDR</i>                              | 5729       | 1.03258                      | 0.01848 | 0.03700 |
| <i>PRR5L</i>                              | 79899      | 1.03002                      | 0.00000 | 0.00002 |
| <i>B4GALT5</i>                            | 9334       | 1.02674                      | 0.00057 | 0.00341 |
| <i>KLRC4</i>                              | 8302       | 1.01029                      | 0.00058 | 0.00232 |
| <i>JAKMIP2</i>                            | 9832       | 1.00682                      | 0.00187 | 0.01120 |
| <b>Down-regulated in CD28<sup>-</sup></b> |            |                              |         |         |
| <i>CD28</i>                               | 940        | -3.21368                     | 0.00000 | 0.00000 |
| <i>RCAN3</i>                              | 11123      | -3.09246                     | 0.00000 | 0.00000 |
| <i>LRRN3</i>                              | 54674      | -3.01606                     | 0.00001 | 0.00003 |

Table S1. Microarray identifies 159 differentially regulated genes between CD8<sup>+</sup>CD28<sup>+</sup> and CD8<sup>+</sup>CD28<sup>-</sup> T cells (Continued)

| Gene name    | entrez_ids | log <sub>2</sub> fold change | P-value | FDR     |
|--------------|------------|------------------------------|---------|---------|
| LEF1         | 51176      | -2.88079                     | 0.00000 | 0.00000 |
| SCML1        | 6322       | -2.85338                     | 0.00000 | 0.00001 |
| NELL2        | 4753       | -2.75817                     | 0.00069 | 0.00414 |
| CCR7         | 1236       | -2.75189                     | 0.00000 | 0.00000 |
| CCR4         | 1233       | -2.73984                     | 0.00010 | 0.00123 |
| CD62L (SELL) | 6402       | -2.72432                     | 0.00068 | 0.00407 |
| VSIG1        | 340547     | -2.64089                     | 0.00000 | 0.00000 |
| IFI44L       | 10964      | -2.44298                     | 0.00643 | 0.03860 |
| SERINC5      | 256987     | -2.40756                     | 0.00000 | 0.00000 |
| TXK          | 7294       | -2.40674                     | 0.00002 | 0.00012 |
| ITGA6        | 3655       | -2.25528                     | 0.00000 | 0.00000 |
| FCER1G       | 2207       | -2.20898                     | 0.00232 | 0.01390 |
| HOOK1        | 51361      | -1.98196                     | 0.00001 | 0.00002 |
| GCNT4        | 51301      | -1.97421                     | 0.00061 | 0.00147 |
| GZMK         | 3003       | -1.95871                     | 0.00108 | 0.00647 |
| ZNF204       | 7754       | -1.93824                     | 0.00005 | 0.00021 |
| NRCAM        | 4897       | -1.88703                     | 0.00307 | 0.01230 |
| AK5          | 26289      | -1.85673                     | 0.00018 | 0.00055 |
| DSC1         | 1823       | -1.83981                     | 0.00094 | 0.00376 |
| SESN3        | 143686     | -1.83407                     | 0.00321 | 0.03850 |
| LOC100288114 | 100288114  | -1.83211                     | 0.00000 | 0.00003 |
| SLC4A10      | 57282      | -1.82461                     | 0.00021 | 0.00246 |
| SH3BGRL2     | 83699      | -1.77375                     | 0.00002 | 0.00022 |
| IFI44        | 10561      | -1.75209                     | 0.00018 | 0.00109 |
| CNKSR2       | 22866      | -1.67434                     | 0.00000 | 0.00000 |
| FAAH2        | 158584     | -1.63792                     | 0.00020 | 0.00122 |
| ABLIM1       | 3983       | -1.63051                     | 0.00138 | 0.00829 |
| RASGRF2      | 5924       | -1.56132                     | 0.00002 | 0.00018 |
| MAL          | 4118       | -1.55220                     | 0.00000 | 0.00000 |
| NT5E         | 4907       | -1.54542                     | 0.00099 | 0.00396 |
| DENND5A      | 23258      | -1.54457                     | 0.00002 | 0.00011 |
| IL6ST        | 3572       | -1.48902                     | 0.00003 | 0.00016 |
| IGF1R        | 3480       | -1.46375                     | 0.00001 | 0.00005 |
| OR10AD1      | 121275     | -1.42079                     | 0.00000 | 0.00000 |
| LASS6        | 253782     | -1.41802                     | 0.00196 | 0.01170 |
| DOCK9        | 23348      | -1.39609                     | 0.00000 | 0.00000 |
| KLF7         | 8609       | -1.38395                     | 0.00005 | 0.00056 |
| SULT1B1      | 27284      | -1.37986                     | 0.00802 | 0.03210 |
| IL26         | 55801      | -1.37830                     | 0.00093 | 0.01120 |
| CAMK4        | 814        | -1.36832                     | 0.00001 | 0.00006 |
| CCR2         | 729230     | -1.34807                     | 0.00097 | 0.01170 |
| APP          | 351        | -1.33761                     | 0.00004 | 0.00026 |
| C9orf135     | 138255     | -1.33327                     | 0.00771 | 0.04620 |
| EFHA2        | 286097     | -1.33119                     | 0.00034 | 0.00202 |
| INADL        | 10207      | -1.32465                     | 0.00000 | 0.00000 |
| USP6NL       | 9712       | -1.32055                     | 0.00003 | 0.00042 |
| LMO7         | 4008       | -1.31889                     | 0.00018 | 0.00109 |
| GPR82        | 27197      | -1.30788                     | 0.00133 | 0.01300 |
| PDE3B        | 5140       | -1.30030                     | 0.00060 | 0.00362 |
| USP53        | 54532      | -1.29765                     | 0.00001 | 0.00004 |
| CAMSAP1L1    | 23271      | -1.29739                     | 0.00006 | 0.00037 |
| FAM117B      | 150864     | -1.29393                     | 0.00093 | 0.00560 |
| PRKCA        | 5578       | -1.28151                     | 0.00001 | 0.00006 |
| SLC16A10     | 117247     | -1.26315                     | 0.00699 | 0.04190 |
| ACVR1C       | 130399     | -1.25999                     | 0.00001 | 0.00007 |
| SLAMF1       | 6504       | -1.25618                     | 0.00177 | 0.01060 |
| PDK1         | 5163       | -1.25416                     | 0.00006 | 0.00035 |
| RAB3GAP1     | 22930      | -1.25248                     | 0.00001 | 0.00004 |
| KDSR         | 2531       | -1.24796                     | 0.00027 | 0.00320 |
| ALPK1        | 80216      | -1.24721                     | 0.00018 | 0.00217 |
| GPR34        | 2857       | -1.24673                     | 0.00208 | 0.02500 |
| SAMD12       | 401474     | -1.24492                     | 0.00001 | 0.00006 |
| C9orf72      | 203228     | -1.24421                     | 0.00002 | 0.00017 |

Table S1. **Microarray identifies 159 differentially regulated genes between CD8<sup>+</sup>CD28<sup>+</sup> and CD8<sup>+</sup>CD28<sup>-</sup> T cells** (Continued)

| Gene name  | entrez_ids | log <sub>2</sub> fold change | P-value | FDR     |
|------------|------------|------------------------------|---------|---------|
| NBEA       | 26960      | -1.23812                     | 0.00012 | 0.00073 |
| ZNF238     | 10472      | -1.22531                     | 0.00055 | 0.00333 |
| C1orf162   | 128346     | -1.21798                     | 0.00012 | 0.00047 |
| RALGPS2    | 55103      | -1.21599                     | 0.00003 | 0.00018 |
| ZNF208     | 7757       | -1.21537                     | 0.00055 | 0.00659 |
| CSGALNACT1 | 55790      | -1.21343                     | 0.00008 | 0.00033 |
| LRRC16A    | 55604      | -1.21062                     | 0.00026 | 0.00105 |
| CLUAP1     | 23059      | -1.19804                     | 0.00000 | 0.00000 |
| GTSCR1     | 220158     | -1.18521                     | 0.00379 | 0.01520 |
| ZFP28      | 140612     | -1.17834                     | 0.00001 | 0.00003 |
| BACH2      | 60468      | -1.17753                     | 0.00064 | 0.00386 |
| EPHX2      | 2053       | -1.16847                     | 0.00349 | 0.02090 |
| SPG20      | 23111      | -1.16119                     | 0.00029 | 0.00115 |
| OCM        | 654231     | -1.15669                     | 0.00057 | 0.00170 |
| LOC283174  | 283174     | -1.12311                     | 0.00013 | 0.00078 |
| OCM2       | 4951       | -1.11977                     | 0.00071 | 0.00213 |
| RIC3       | 79608      | -1.09937                     | 0.00035 | 0.00211 |
| RBM11      | 54033      | -1.09596                     | 0.00001 | 0.00005 |
| ZFYVE9     | 9372       | -1.09436                     | 0.00000 | 0.00001 |
| FAM102A    | 399665     | -1.08628                     | 0.00192 | 0.01150 |
| IGSF9B     | 22997      | -1.08560                     | 0.00034 | 0.00409 |
| CNN3       | 1266       | -1.07971                     | 0.00327 | 0.00981 |
| NPCDR1     | 246734     | -1.06681                     | 0.01193 | 0.04770 |
| VWDE       | 221806     | -1.05085                     | 0.00060 | 0.00241 |
| OXNAD1     | 92106      | -1.04769                     | 0.00000 | 0.00003 |
| C13orf15   | 28984      | -1.03962                     | 0.00896 | 0.03580 |
| FAM134B    | 54463      | -1.02815                     | 0.00001 | 0.00004 |
| TMEM14C    | 51522      | -1.02783                     | 0.00001 | 0.00006 |
| DAPP1      | 27071      | -1.02770                     | 0.00000 | 0.00000 |
| FLJ44048   | 401024     | -1.02506                     | 0.00068 | 0.00408 |
| ME1        | 4199       | -1.02438                     | 0.00307 | 0.03680 |
| ACVR2A     | 92         | -1.02148                     | 0.00056 | 0.00220 |
| CASP10     | 843        | -1.02041                     | 0.00004 | 0.00025 |
| DSEL       | 92126      | -1.01814                     | 0.00003 | 0.00013 |
| P2RY14     | 9934       | -1.01522                     | 0.01979 | 0.03960 |
| LY96       | 23643      | -1.01413                     | 0.00364 | 0.02190 |

Table S2. **Primer list for qRT-PCR**

| Human gene | qRT-PCR forward primers (5'-3') | qRT-PCR reverse primers (5'-3') |
|------------|---------------------------------|---------------------------------|
| RPL13A     | CCTGGAGGAGAAGAGAAAGAGA          | TTGAGGACCTCTGTGATTTGTCAA        |
| SIRT1      | GCCTCACATGCAAGCTCTAGTGAC        | TTCGAGGATCTGTGCCAATCATAA        |
| GZMB       | CCCTGGGAAAACACTCACACA           | GCACAACCTCAATGGTACTGTCC         |
| PRF1       | GGCTGGACGTGACTCCTAAG            | CTGGGTGGAGGCGTTGAAG             |
| IFNG       | TCGGTAACTGACTTGAATGTCCA         | TCGCTTCCCTGTTTTAGCTGC           |
| CCR7       | TGAGGTCACGGACGATTACAT           | GTAGGCCACGAAACAAATGAT           |
| CD62L      | CTTTCACCAAGGGCGATTTA            | GGCATTATCATTGGCTGG              |
| IL7R       | CCCTCGTGGAGGTAAGTGC             | CCTTCCCGATAGACGACACTC           |
| KLRG1      | TCCATGTTAGAGTTGCCTACGG          | AAGTGGAGTAGTTGGAGCCCT           |
| FOXO1      | TCGTCATAATCTGTCCTACACA          | CGGCTTCGGCTCTTAGCAAA            |
